# Supplementary material for: Anti-Inflammatory and Chondroprotective Effects of Vanillic Acid and Epimedin C in Human Osteoarthritic Chondrocytes
Source: PubMed Central journal article supplement (PMC7356262; doi:10.3390/biom10060932), 2020-06-19
Supplement: biomolecules-10-00932-s001.pdf [file biomolecules-10-00932-s001.pdf]

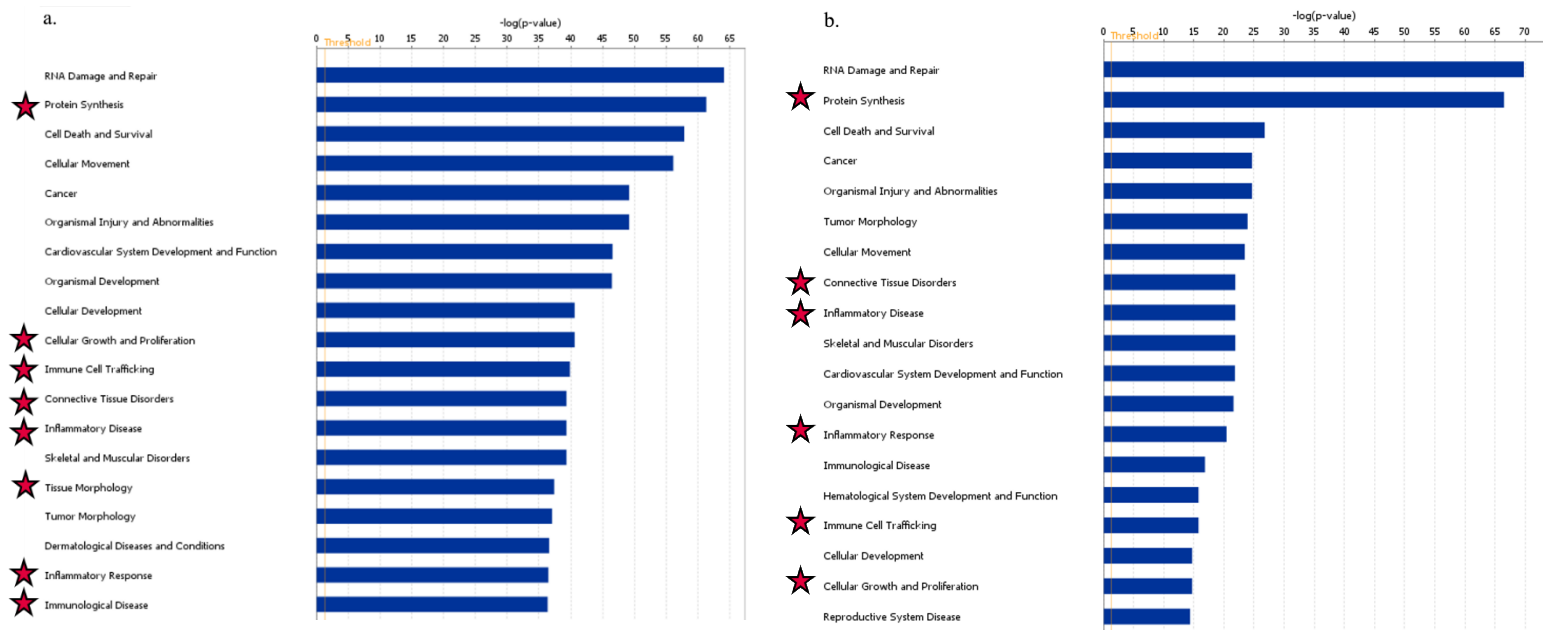

**Figure S1.** Top Diseases and Biological Functions from the Core analysis. **a)** Top results from the downstream effect analysis that was run as part of the Core analysis to identify functional endpoints, biological and cellular processes that overlap with the VA vs. Ctr negative dataset. **b)** Downstream effect analysis related to the biological and cellular processes that overlap with the Epi C vs. Ctr negative group dataset. The marked terms are high-level categories of biological and clinical processes or functions that fit to the expected biological context. The  $p$ -values are provided by Fisher's exact test (right tailed) to assess whether a given overlap is due to chance alone (low  $p$ -value rejects the null hypothesis = significant association).

a.

| The Filter found 36 Functions for Immune Cell Trafficking |                                           |          |                            |                    |                                      |             |
|-----------------------------------------------------------|-------------------------------------------|----------|----------------------------|--------------------|--------------------------------------|-------------|
| Categories                                                | Diseases or Functions Annotation          | p-value  | Predicted Activation State | Activation z-score | Molecules                            | # Molecules |
| Cell-To-Cell Signali...                                   | Activation of leukocytes                  | 1.90E-18 | Decreased                  | -3.828             | ↑AGRN, ↑AHNAK, ↑ANXA1, ↑AN...all     | 105         |
| Cell-To-Cell Signali...                                   | Activation of lymphocytes                 | 5.46E-13 | Decreased                  | -3.689             | ↑AGRN, ↑AHNAK, ↑ANXA1, ↑BTN...all    | 69          |
| Cellular Movement,...                                     | Migration of phagocytes                   | 6.23E-18 | Decreased                  | -3.447             | ↑ABCC1, ↑ABL1, ↑ALCAM, ↑ANXA1...all  | 59          |
| Cellular Movement,...                                     | Chemotaxis of leukocytes                  | 9.23E-16 | Decreased                  | -3.378             | ↑ACKR3, ↑ANXA1, ↑AQP9, ↑C3AR1...all  | 64          |
| Cellular Movement,...                                     | Chemotaxis of phagocytes                  | 2.36E-15 | Decreased                  | -3.335             | ↑ANXA1, ↑AQP9, ↑C3AR1, ↑C5AR2...all  | 56          |
| Hematological Syst...                                     | Accumulation of phagocytes                | 1.43E-18 | Decreased                  | -3.313             | ↑ACKR3, ↑ANXA1, ↑CCL11, ↑CCL2...all  | 41          |
| Cell-To-Cell Signali...                                   | Activation of phagocytes                  | 3.64E-13 | Decreased                  | -3.100             | ↑ANXA1, ↑ANXA2, ↑ATF3, ↑BDNF...all   | 60          |
| Hematological Syst...                                     | Accumulation of leukocytes                | 1.15E-23 | Decreased                  | -3.092             | ↑ACKR3, ↑ANXA1, ↑BCL2A1, ↑BGN...all  | 65          |
| Cellular Movement,...                                     | Cell movement of phagocytes               | 2.98E-26 | Decreased                  | -2.970             | ↑ABCC1, ↑ABL1, ↑ADM, ↑ALCAM...all    | 110         |
| Cellular Movement,...                                     | Cell movement of macrophages              | 2.57E-19 | Decreased                  | -2.850             | ↑ABL1, ↑ANXA1, ↑C3AR1, ↑CAV1...all   | 62          |
| Cell-To-Cell Signali...                                   | Activation of antigen presenting cells    | 5.27E-13 | Decreased                  | -2.732             | ↑ANXA2, ↑ATF3, ↑BDNF, ↑CCL11...all   | 54          |
| Cellular Movement,...                                     | Homing of leukocytes                      | 2.52E-18 | Decreased                  | -2.716             | ↑ACKR3, ↑ANXA1, ↑AQP9, ↑C3AR1...all  | 71          |
| Cellular Movement,...                                     | Cell movement of neutrophils              | 5.02E-21 | Decreased                  | -2.670             | ↑ADM, ↑ANXA1, ↑ANXA2, ↑AQP9...all    | 68          |
| Cellular Movement,...                                     | Cell movement of antigen presenting cells | 4.69E-20 | Decreased                  | -2.585             | ↑ABCC1, ↑ABL1, ↑ALCAM, ↑ANXA1...all  | 74          |
| Cellular Movement,...                                     | Migration of mononuclear leukocytes       | 2.21E-20 | Decreased                  | -2.444             | ↑ABCC1, ↑ACKR3, ↑ANXA1, ↑ANX...all   | 76          |
| Cell-To-Cell Signali...                                   | Recruitment of leukocytes                 | 4.27E-25 | Decreased                  | -2.415             | ↑ADGRG6, ↑ANXA1, ↑C3AR1, ↑C...all    | 75          |
| Cell-To-Cell Signali...                                   | Recruitment of phagocytes                 | 8.33E-19 | Decreased                  | -2.368             | ↑ADGRG6, ↑ANXA1, ↑C3AR1, ↑C...all    | 56          |
| Hematological Syst...                                     | Accumulation of granulocytes              | 1.88E-14 | Decreased                  | -2.301             | ↑ANXA1, ↑BCL2A1, ↑CCL11, ↑CCL2...all | 30          |
| Cellular Movement,...                                     | Cell movement of granulocytes             | 1.42E-23 | Decreased                  | -2.297             | ↑ADM, ↑ANXA1, ↑ANXA2, ↑AQP9...all    | 81          |
| Cell-To-Cell Signali...                                   | Adhesion of immune cells                  | 3.59E-17 | Decreased                  | -2.263             | ↑ABL1, ↑ALCAM, ↑ANXA1, ↑BMPE...all   | 66          |
| Cellular Movement,...                                     | Lymphocyte migration                      | 5.11E-17 | Decreased                  | -2.252             | ↑ABCC1, ↑ACKR3, ↑ANXA1, ↑CAV1...all  | 67          |
| Cellular Movement,...                                     | Cell movement of leukocytes               | 1.42E-34 | Decreased                  | -2.240             | ↑ABCC1, ↑ABL1, ↑ACKR3, ↑ADM...all    | 152         |
| Cellular Movement,...                                     | Leukocyte migration                       | 1.36E-40 | Decreased                  | -2.008             | ↑ABCC1, ↑ABL1, ↑ACKR3, ↑ADG...all    | 182         |

b.

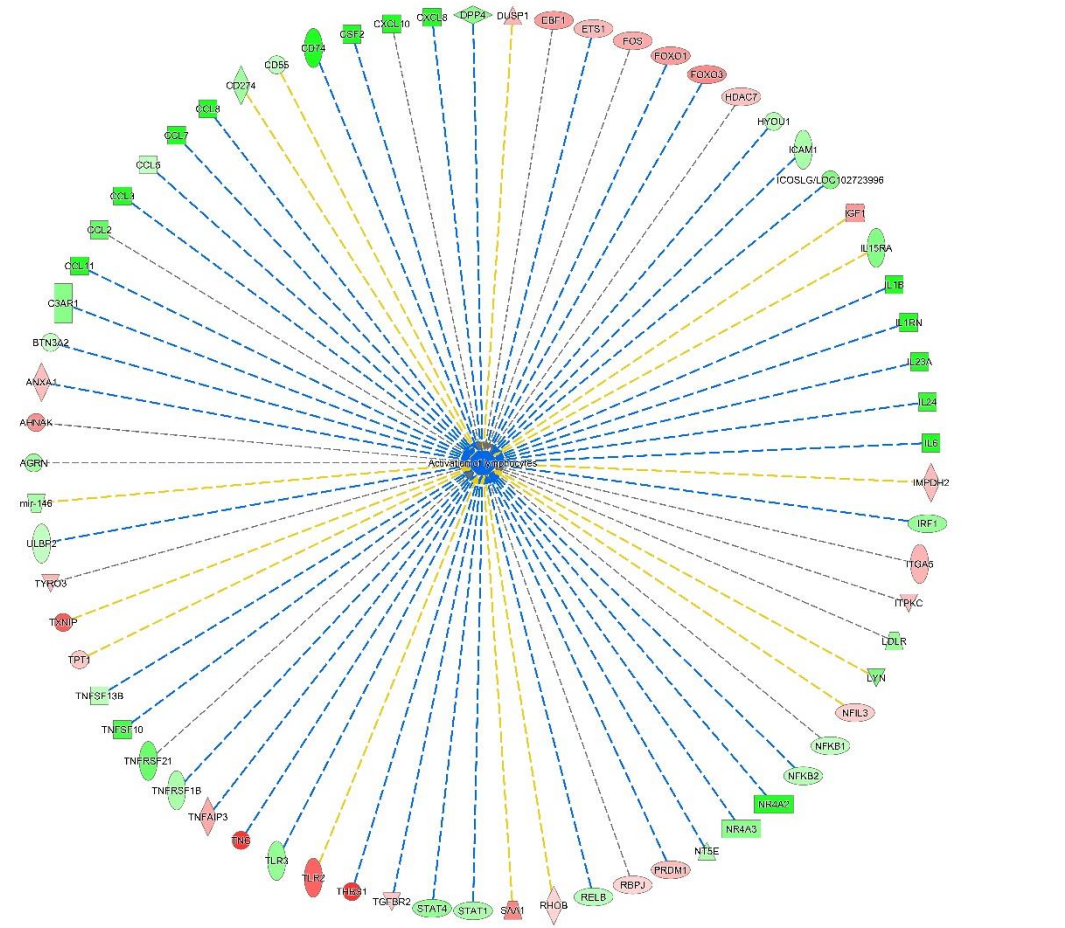

**Figure S2.** Low-level (specific) process or functions belonging to the high-level category “Immune cell trafficking”. **a)** For the VA vs. Ctr group; most terms in this table have significantly negative activation z-scores. **b)** The network of the term “Activation of lymphocytes” in the list of top disorder in the high-level category “Immune cell trafficking”. The central term “Activation of lymphocytes” is filled with blue. A blue filling marks a predicted “decrease” of the function or process. The nodes in

the periphery are filled with either green (down-regulation in the experiment) or red (up-regulation in the experiment).

a.

| Categories                              | Diseases or Functions Annotation          | p-value  | Predicted Activation State | Activation z-score | Molecules                                    | # Molecules |
|-----------------------------------------|-------------------------------------------|----------|----------------------------|--------------------|----------------------------------------------|-------------|
| Connective Tissue Disorders, Inflamm... | Inflammation of joint                     | 3.69E-21 |                            | -1.773             | +ACAN, +ADAMTS1, +ADGRG6, +ADRA...all 78     | 78          |
| Connective Tissue Disorders, Inflamm... | Rheumatic Disease                         | 1.28E-22 |                            | -1.134             | +ACAN, +ACSL5, +ADAMTS1, +ADGRG6, ...all 92  | 92          |
| Inflammatory Disease                    | Chronic inflammatory disorder             | 4.03E-12 |                            | -0.651             | +ACAN, +ADGRG6, +ADRA2A, +AQP9, ...all 66    | 66          |
| Connective Tissue Disorders, Inflamm... | Polyarthritis                             | 2.02E-06 |                            | -0.577             | +CCL20, +CD74, +COL2A1, +CSF3, +GA...all 15  | 15          |
| Connective Tissue Disorders, Immun...   | Rheumatoid arthritis                      | 1.76E-16 |                            |                    | +ACAN, +ADGRG6, +ADRA2A, +AQP9, ...all 58    | 58          |
| Connective Tissue Disorders, Inflamm... | Osteoarthritis                            | 4.63E-11 |                            |                    | +ACAN, +ADAMTS1, +ADRA2A, +ASP...all 24      | 24          |
| Inflammatory Disease, Neurological D... | Inflammatory demyelinating disease        | 4.45E-08 |                            |                    | +ADRA2A, +ALCAM, +BST2, +CCL2, +CR...all 21  | 21          |
| Connective Tissue Disorders, Immun...   | Systemic lupus erythematosus              | 8.59E-08 |                            |                    | +ACSL5, +BST2, +CCL2, +CXCL10, +EPS...all 26 | 26          |
| Inflammatory Disease, Neurological D... | Multiple Sclerosis                        | 1.53E-07 |                            |                    | +ADRA2A, +ALCAM, +BST2, +CCL2, +CR...all 20  | 20          |
| Connective Tissue Disorders, Immun...   | Polyarticular juvenile rheumatoid arth... | 6.51E-07 |                            |                    | +CCL20, +CD74, +GADD45B, +IL6R, +N...all 11  | 11          |
| Connective Tissue Disorders, Inflamm... | Intervertebral disc disorder              | 4.10E-06 |                            |                    | +ADRA2A, +ASP...all 8                        | 8           |

b.

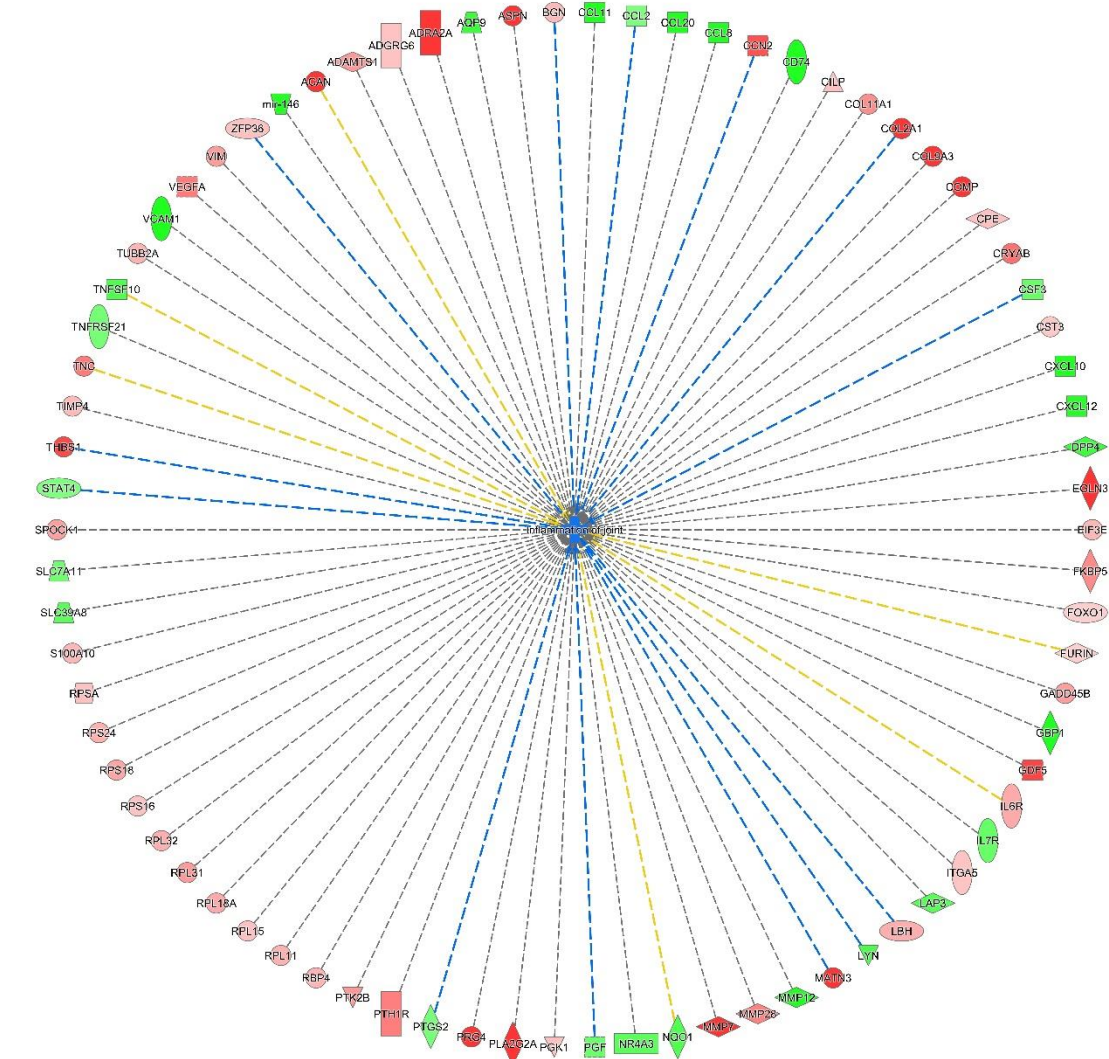

**Figure S3.** The example network of the term “Inflammation of the joints” a) the table of low-level (specific) process or functions that belong to the high-level category “Inflammatory disease” for Epi C vs. Ctr vehicle group. b) The term “Inflammation of the joints” was decreased and this is supported by down-regulated chemokines and cytokines as well as up-regulated ECM components, such as COL2A1, BGN, and CCN2. The central term “Inflammation of the joints” is filled with blue. A blue filling marks a predicted “decrease” of the function or process. The nodes in the periphery are filled with either green (down-regulation in the experiment) or red (up-regulation in the experiment).

a.

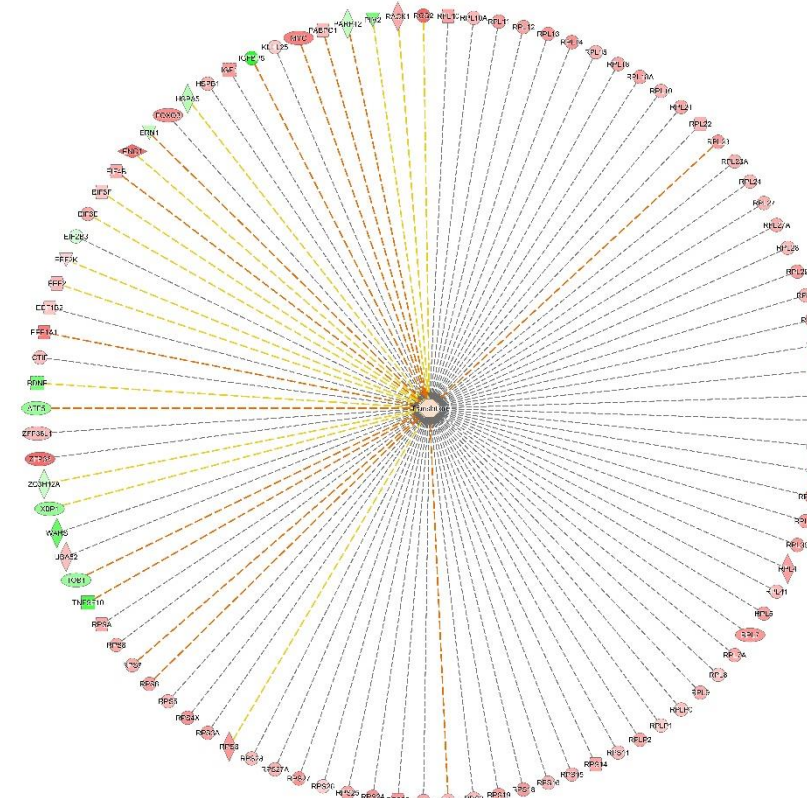

b.

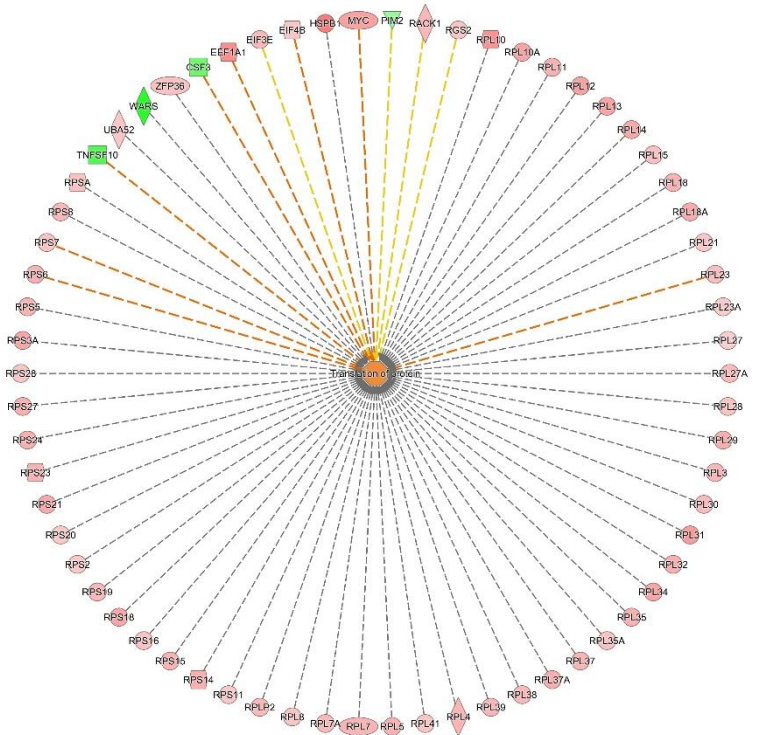

**Figure S4.** Example network of the term “Translation” that belongs to the high-level category “Protein synthesis”. Most of these data set nodes represent ribosomal genes or translation initiation/elongation factors. **a)** The network for the VA vs. Ctr vehicle group and **b)** The network for the Epi C vs. Ctr

vehicle group are shown. The central node represents the term and the nodes in the periphery, associated with this term are shown. The central term "Translation" is filled with orange, which indicates the predicted tendency for "increase" (non-significant). The nodes in the periphery are filled with either green (down-regulation in the experiment) or red (up-regulation in the experiment). Some of the proteins with increased expression are COL5A1, COL6A3, COL8A1, BGN, LAMA2, LAMA3, LAMB1, LAMC1.

a.

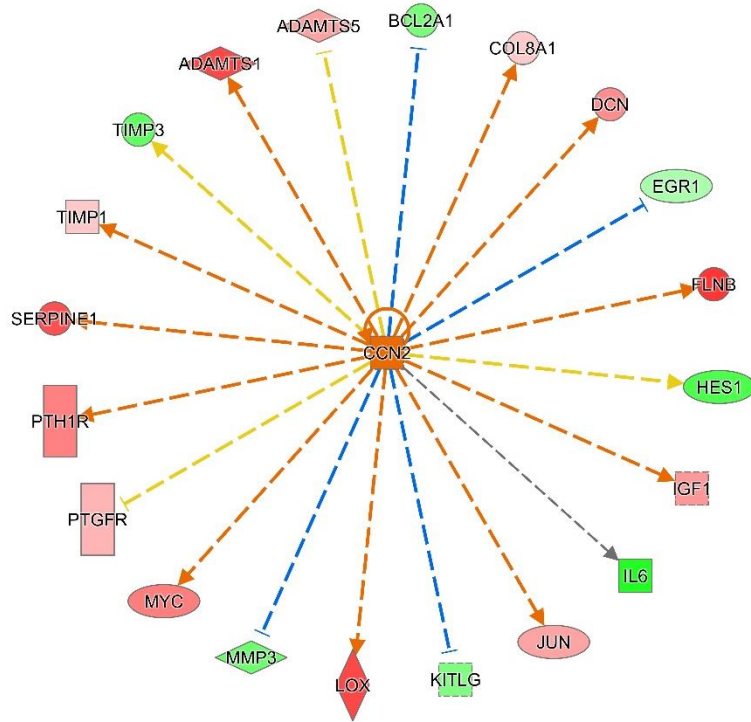

b.

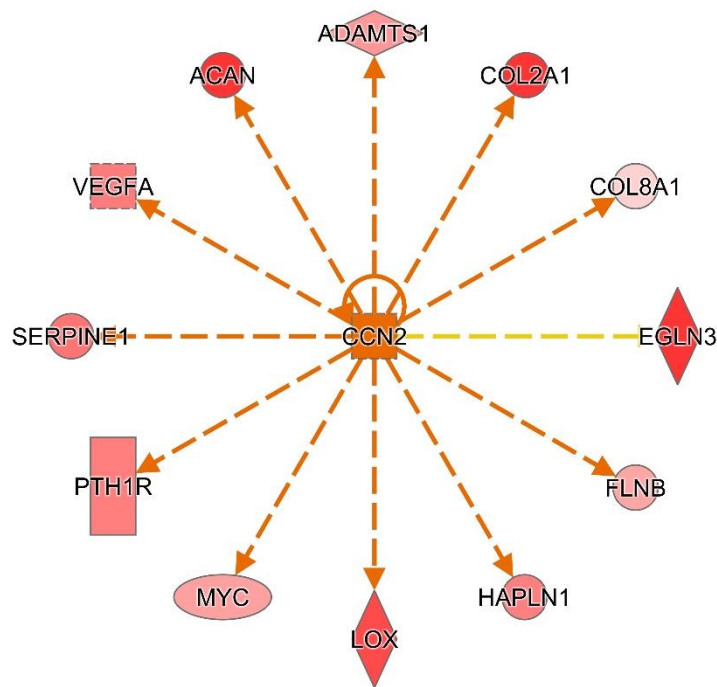

**Figure S5.** The example of the upstream regulator network of CCN2. a) The network for the VA vs. Ctr vehicle group and b) The network for the Epi C vs. Ctr vehicle group are shown. The central node

represents the upstream regulator and the nodes in the periphery data set represent molecules regulated by the upstream regulator. The central term “CCN2” is filled with orange, which indicates the predicted increase. The nodes in the periphery are filled with either green (down-regulation in the experiment) or red (up-regulation in the experiment). This network provides one explanation for the up-regulation of many ECM components.

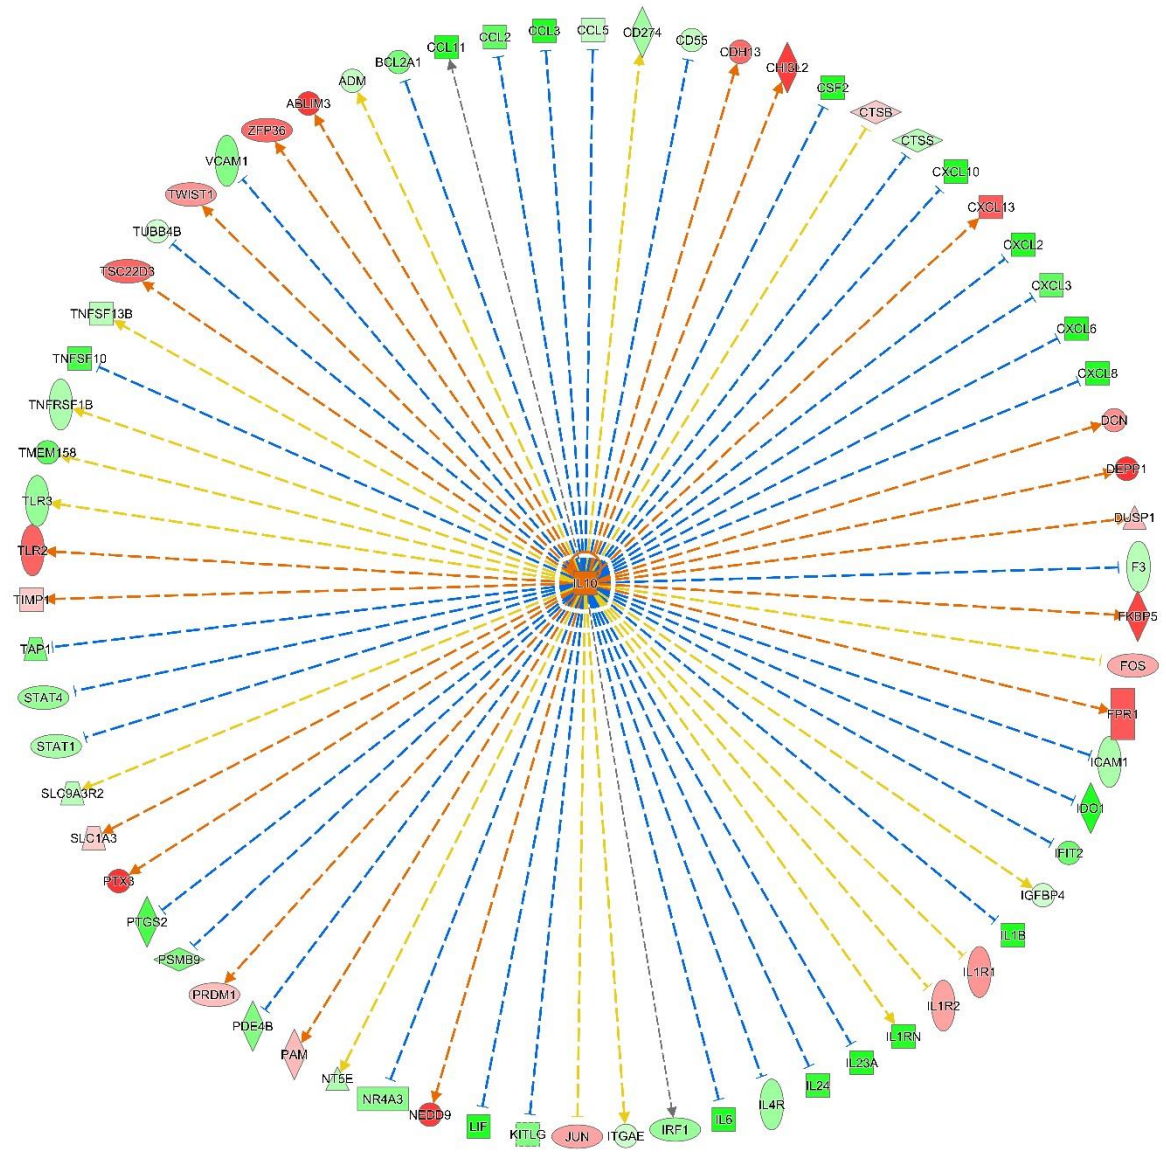

**Figure 6.** The example of the upstream regulator network of IL-10. The central node represents the upstream regulator and the nodes in the periphery data set represent molecules regulated by the upstream regulator. The central term "IL10" is filled with orange, which indicates the up-regulation of the IL-10. This network provides one explanation for the down-regulation of many different chemokines and cytokines in the experiment.

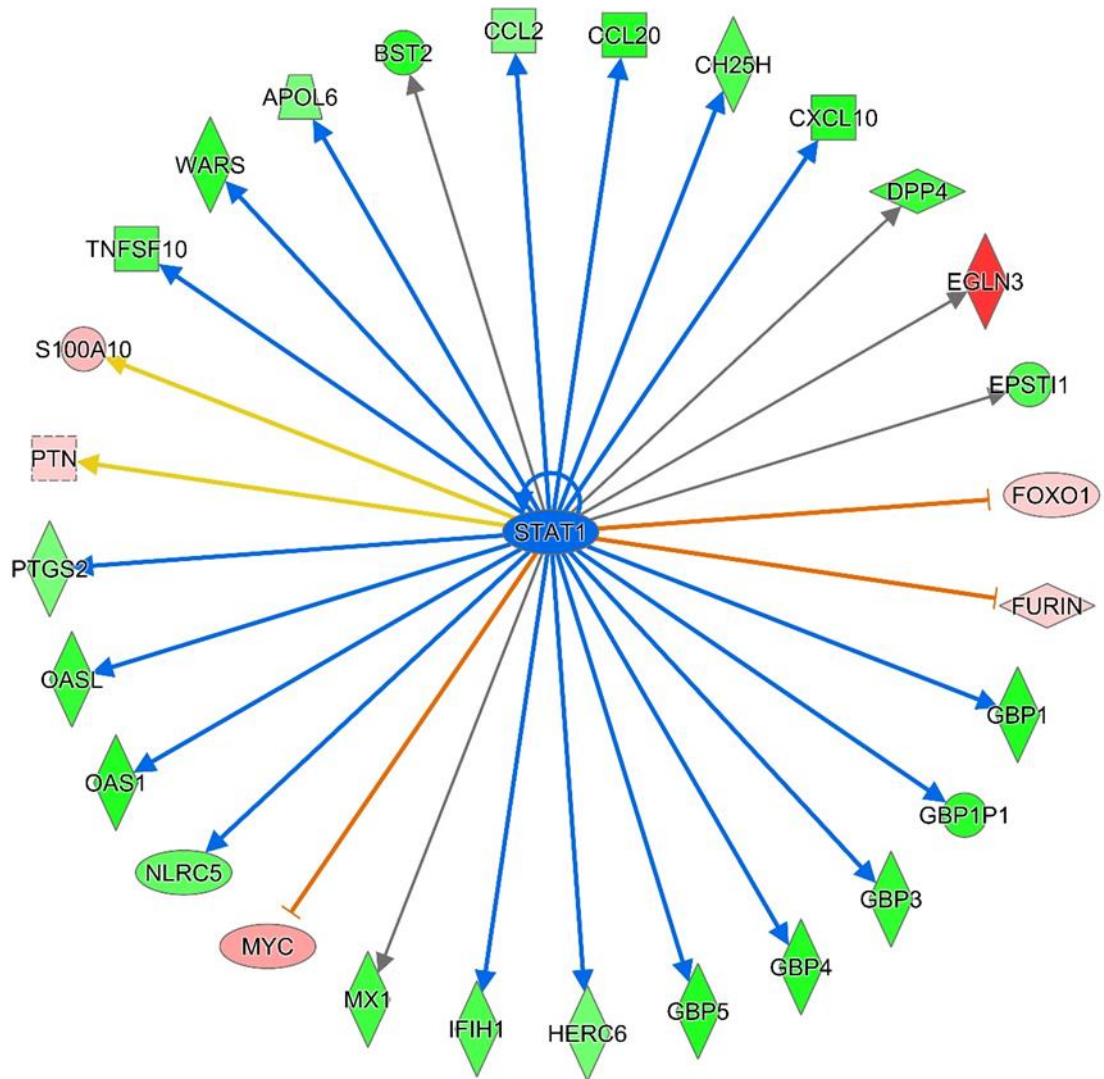

**Figure S7.** The example of the upstream regulator network for the inhibited STAT1 in Epi C vs. Ctr group. The predicted inhibition of this putative upstream regulator relates to down-regulation of selected chemokines and cytokines. The central term “STAT1” is filled with blue. A blue filling marks a predicted “decrease” of the function or process. The nodes in the periphery are filled with either green (down-regulation in the experiment) or red (up-regulation in the experiment).

a.

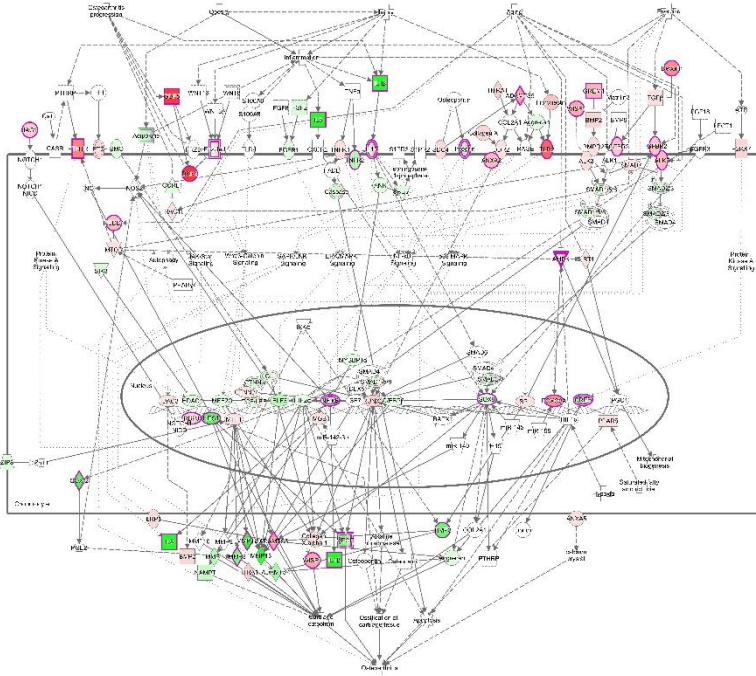

b.

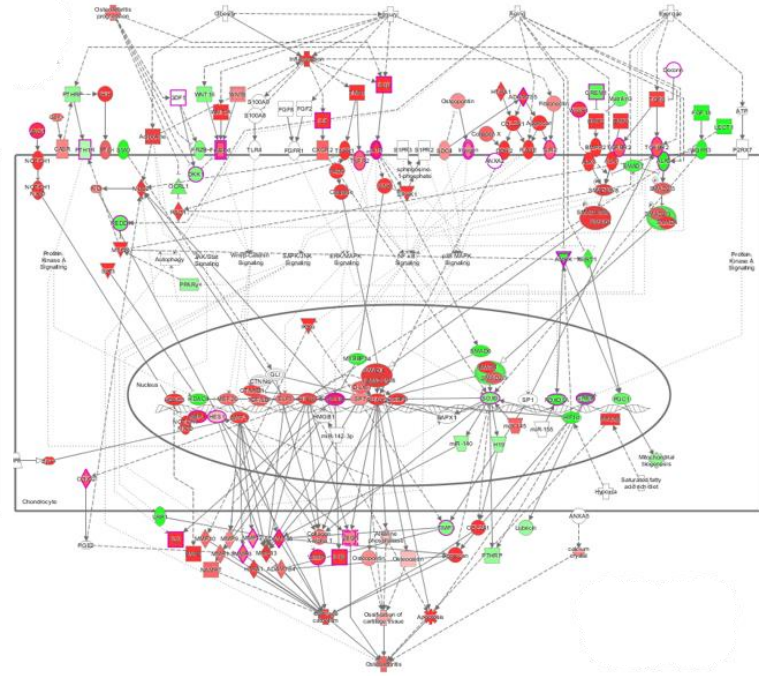

**Figure S8.** The first relevant and significant canonical pathway for VA vs. Ctr treatment group is the “Osteoarthritis signaling”. **a)** The activation z-score suggests a tendency for inhibition. Based on the activation z-score, the normal function of this pathway is reduced. Elements of this canonical pathway are shown as different shapes (nodes). These shapes are filled with red (up-regulation in the experiment) or green (down-regulation in the experiment). **b)** Shows the canonical pathway “Osteoarthritis signaling” overlaid with expected node activities considering this pathway as being fully activated (The expected activities are a result of curations of relevant papers, reviews and textbooks and can be compared to overlays of actual experimental measurements). Red fillings represent “activated”, green fillings “inhibited”. Nodes with purple highlights (borders) have passed the cut-offs.



a.

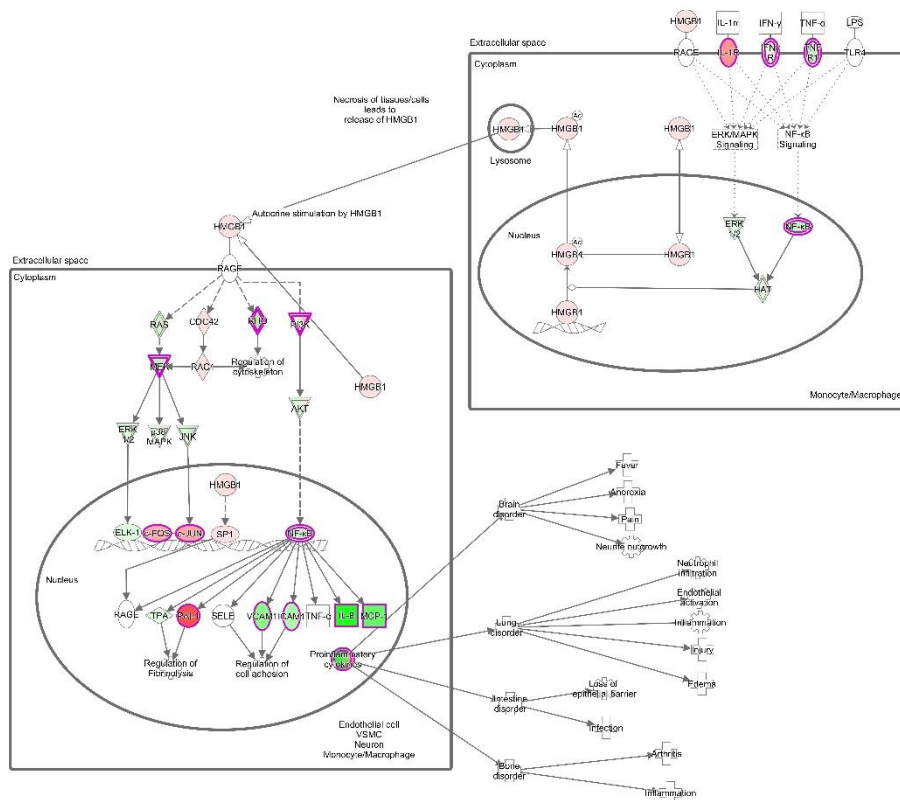

b.

b.

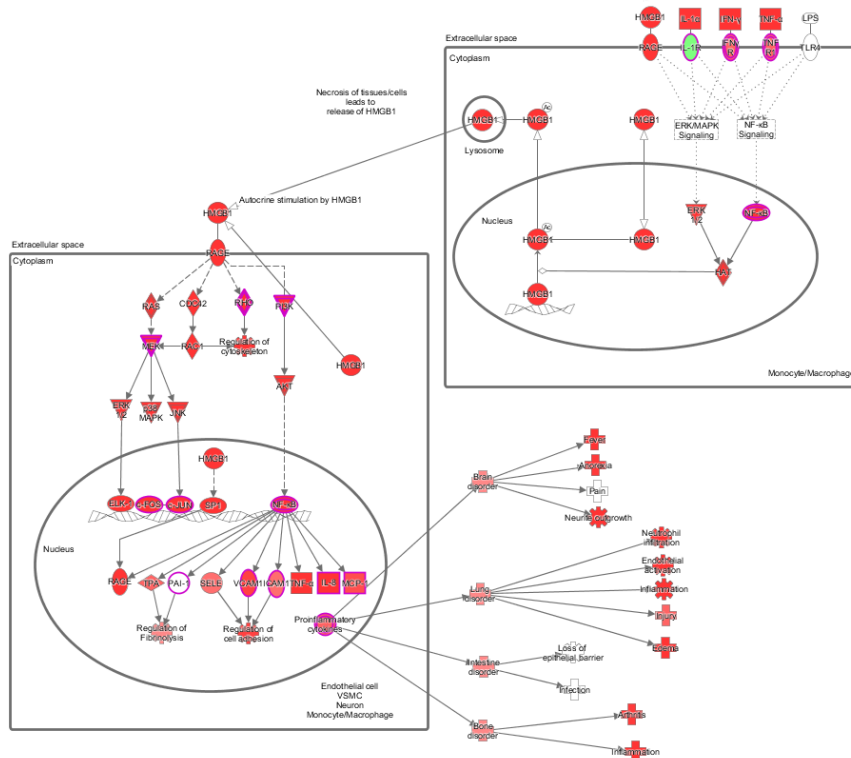

**Figure S9.** The canonical pathway “HMGB1 signaling” overlaid with experimental data from VA vs. Ctr group. **a)** The activation z-score is negative and is very close to the significance threshold. Therefore, we would assume that this pathway has a strong tendency to be inhibited. Central to this pathway is the down-regulation of NF-κB. **b)** “HMGB1 signaling” overlaid with expected activities. The comparison of the expected activities and actual measurements confirms the inhibition of this pathway. Red fillings represent “activated”, green fillings “inhibited” purple highlights = passed cut-offs, no highlight = didn’t pass cut-offs.

a.

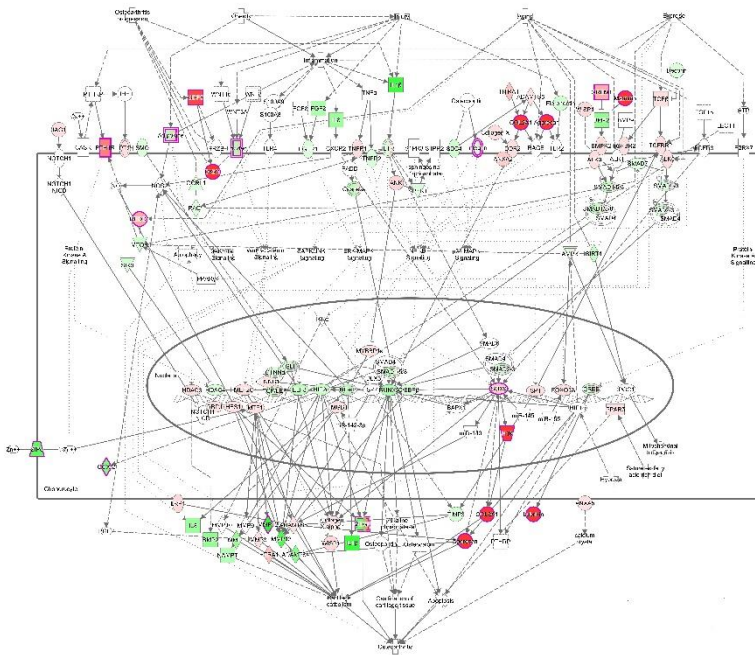

b.

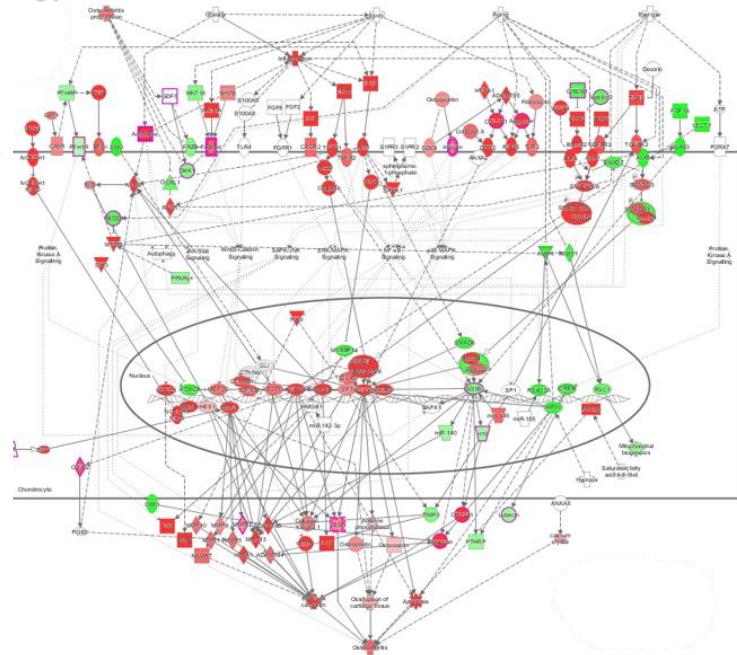

**Figure S10.** The first relevant and significant canonical pathway for Epi C vs. Ctr treatment group is the “Osteoarthritis signaling”. **a)** The activation z-score suggests a tendency for inhibition. Based on the activation z-score ( $p$ -value =  $1.45E-3$ , z-score =  $-1.213$ ), the normal function of this pathway is reduced. Elements of this canonical pathway are shown as different shapes (nodes). These shapes are filled with red (up-regulation in the experiment) or green (down-regulation in the experiment). **b)** Shows the canonical pathway “Osteoarthritis signaling” overlaid with expected node activities considering this pathway as being fully activated (The expected activities are a result of curations of relevant papers, reviews and textbooks and can be compared to overlays of actual experimental measurements). Red fillings represent “activated”, green fillings “inhibited”. Nodes with purple highlights (borders) have passed the cut-offs.

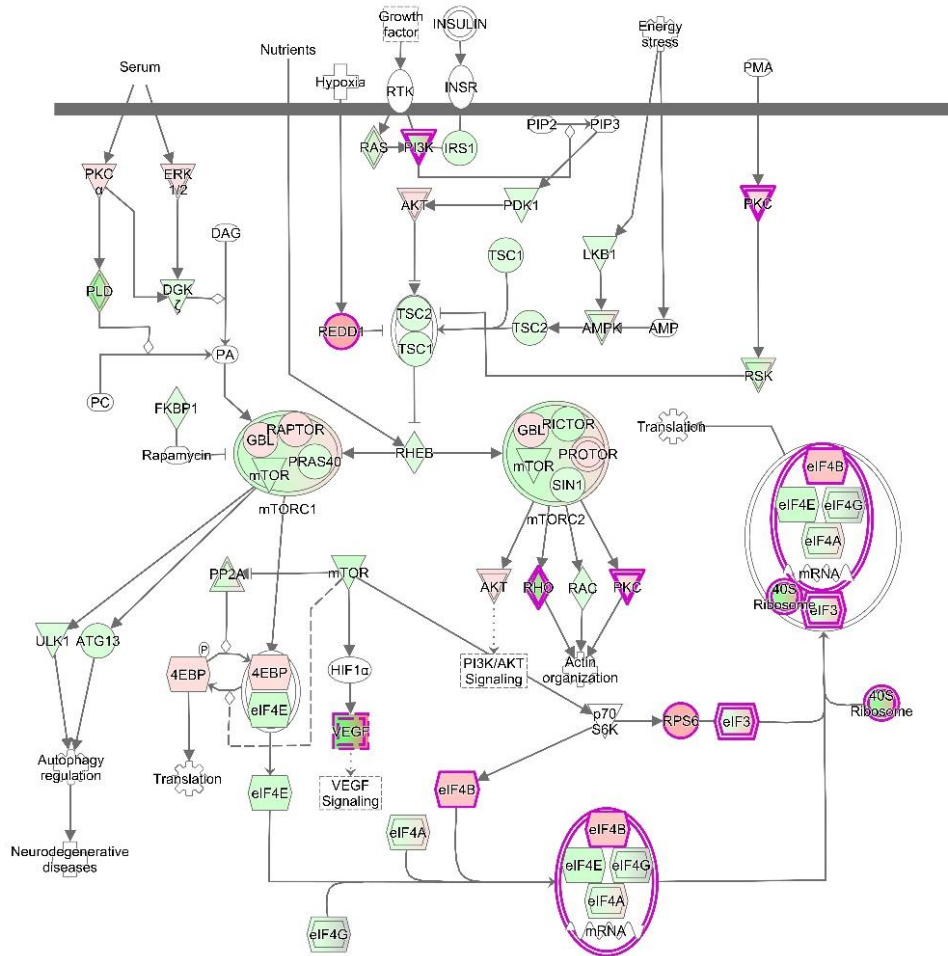

**Figure S11.** The canonical pathway “mTOR signaling”. This pathway was found to be moderately activated (insignificant). A visual inspection of the pathway reveals up-regulated translation initiation/elongation factors and ribosomal genes. PKC and REDD1 are up-regulated. Red fillings represent “activated”, green fillings “inhibited”. Nodes with purple highlights (borders) have passed the cut-offs.

**Table S1.** Differentially expressed genes after RNA Sequencing.**5-HMF**

| Gene                  | Control Vehicle | 5-HMF     | log2_fold_change | q_value   |
|-----------------------|-----------------|-----------|------------------|-----------|
| TMC5                  | 2.64693         | 0.0956953 | -4.78973         | 0.0183303 |
| CCL11                 | 21.6693         | 1.02219   | -4.40592         | 0.0183303 |
| SLAMF7                | 3.7777          | 0.440358  | -3.10076         | 0.0183303 |
| LCNL1,PTGDS           | 32.3785         | 4.34702   | -2.89694         | 0.0183303 |
| RPLP0P2               | 13.0693         | 1.86573   | -2.80837         | 0.0183303 |
| IGFBP3                | 76.5181         | 11.124    | -2.78213         | 0.0183303 |
| LGI2                  | 1.67212         | 0.243663  | -2.77872         | 0.0183303 |
| MEST                  | 1.33042         | 0.220132  | -2.59545         | 0.0183303 |
| C6orf229,FAM65B       | 5.5852          | 0.951031  | -2.55405         | 0.0183303 |
| ADAMTS16              | 1.72847         | 0.304215  | -2.50634         | 0.0424614 |
| PLXDC1                | 9.36292         | 1.83855   | -2.34839         | 0.0183303 |
| BHLHE22               | 1.44655         | 0.313663  | -2.20533         | 0.0424614 |
| SYT7                  | 3.87622         | 0.858705  | -2.17441         | 0.0183303 |
| MT1G                  | 129.101         | 578.799   | 2.16456          | 0.0183303 |
| GJB2                  | 19.5447         | 4.45863   | -2.13211         | 0.0183303 |
| RANBP3L               | 2.02446         | 0.489476  | -2.04823         | 0.0183303 |
| CXCL12                | 44.7552         | 10.8482   | -2.0446          | 0.0183303 |
| COL14A1               | 5.90115         | 1.45538   | -2.0196          | 0.0183303 |
| RP11-231C14.6,SNX29P2 | 3.29369         | 0.834324  | -1.98103         | 0.0183303 |
| TNFSF18               | 1.85544         | 0.481394  | -1.94647         | 0.0319471 |
| CILP                  | 8.55279         | 2.27515   | -1.91043         | 0.0183303 |
| C2CD4A                | 1.47128         | 0.393059  | -1.90426         | 0.0424614 |
| MT1H                  | 43.8177         | 162.402   | 1.88999          | 0.0183303 |
| SEMA3A                | 1.39115         | 0.378459  | -1.87807         | 0.0183303 |
| ARHGAP28              | 5.13577         | 1.43949   | -1.83503         | 0.0183303 |
| C3AR1                 | 31.9442         | 9.50822   | -1.74831         | 0.0183303 |
| RP11-274B21.1         | 5.09561         | 1.53344   | -1.73248         | 0.0183303 |
| ADAMTS12              | 2.90448         | 0.884544  | -1.71527         | 0.0183303 |
| TMEM106A              | 1.71029         | 0.527054  | -1.69822         | 0.0183303 |
| CXCL10                | 44.7117         | 14.1341   | -1.66147         | 0.0424614 |
| SEMA5A                | 5.2664          | 1.70523   | -1.62685         | 0.0183303 |
| IGF1                  | 3.39587         | 1.10182   | -1.62389         | 0.0183303 |
| ITGB8                 | 6.63335         | 2.158     | -1.62004         | 0.0183303 |
| CPXM1                 | 4.08831         | 1.3494    | -1.59919         | 0.0183303 |
| IL7R                  | 10.756          | 3.59456   | -1.58125         | 0.0183303 |
| TRIM56                | 13.0652         | 4.39521   | -1.57172         | 0.0183303 |
| -                     | 2.15229         | 0.727996  | -1.56387         | 0.0183303 |
| FOXP2                 | 1.57725         | 0.537849  | -1.55214         | 0.0183303 |
| IGFBP5                | 81.9929         | 28.4864   | -1.52523         | 0.0183303 |
| VCAM1                 | 15.7227         | 5.48587   | -1.51906         | 0.0183303 |
| CH25H                 | 91.9764         | 32.2598   | -1.51153         | 0.0183303 |
| SEMA4D                | 5.85942         | 2.06433   | -1.50509         | 0.0183303 |
| RP11-640M9.2          | 11.5303         | 4.09642   | -1.49299         | 0.0183303 |

**4-HBA**

| Gene | Control Vehicle | 4-HBA   | log2_fold_change | q_value   |
|------|-----------------|---------|------------------|-----------|
| FOSB | 0.263976        | 37.3909 | 7.14614          | 0.0155513 |
| FOS  | 4.55402         | 144.096 | 4.98375          | 0.0155513 |

|                          |          |          |          |           |
|--------------------------|----------|----------|----------|-----------|
| CCL11                    | 21.8856  | 1.00344  | -4.44696 | 0.0155513 |
| -                        | 0.236927 | 4.01346  | 4.08233  | 0.0351059 |
| C2CD4A                   | 1.482    | 0.132841 | -3.47978 | 0.0155513 |
| CXCL12                   | 45.0349  | 4.5926   | -3.29366 | 0.0155513 |
| MMP12                    | 14.236   | 1.65481  | -3.1048  | 0.0155513 |
| C6orf229,FAM65B          | 5.60808  | 0.693199 | -3.01617 | 0.0155513 |
| ADAMTS16                 | 1.7401   | 0.225879 | -2.94555 | 0.0155513 |
| CXCL13                   | 290.288  | 40.0756  | -2.85669 | 0.0155513 |
| SFRP2                    | 14.832   | 2.04785  | -2.85653 | 0.0155513 |
| -                        | 2.65095  | 0.370007 | -2.84088 | 0.0155513 |
| EGR1                     | 20.5017  | 142.705  | 2.79922  | 0.0155513 |
| RPLP0P2                  | 13.1534  | 2.08821  | -2.6551  | 0.0155513 |
| COL14A1                  | 5.93573  | 0.951672 | -2.64089 | 0.0155513 |
| IGFBP3                   | 77.005   | 12.7427  | -2.59528 | 0.0155513 |
| GJB2                     | 19.6628  | 3.41116  | -2.52714 | 0.0155513 |
| RP11-367F23.2            | 1.72502  | 0.301614 | -2.51583 | 0.0446    |
| CADM3,DARC               | 5.25611  | 0.931491 | -2.49638 | 0.0155513 |
| SYT7                     | 3.90202  | 0.710104 | -2.45812 | 0.0155513 |
| MMP8                     | 24.1625  | 4.40359  | -2.45602 | 0.0155513 |
| PLXDC1                   | 9.42433  | 1.91707  | -2.29749 | 0.0155513 |
| AP001434.2,<br>SPATA20P1 | 3.33822  | 0.690853 | -2.27263 | 0.0268614 |
| CD248                    | 12.3031  | 2.87461  | -2.09759 | 0.0155513 |
| QPRT,SPN                 | 2.53519  | 0.595588 | -2.08971 | 0.0155513 |
| NCALD                    | 1.51106  | 0.361393 | -2.06392 | 0.0155513 |
| CPXM1                    | 4.1156   | 1.02489  | -2.00563 | 0.0155513 |
| CH25H                    | 92.5579  | 23.3474  | -1.98709 | 0.0155513 |
| ADAMTS12                 | 2.92097  | 0.746958 | -1.96735 | 0.0155513 |
| HAS2                     | 13.1636  | 3.43491  | -1.93821 | 0.0155513 |
| CILP                     | 8.59468  | 2.31573  | -1.89198 | 0.0155513 |
| -                        | 1.06049  | 0.29116  | -1.86484 | 0.0351059 |
| ARHGAP28                 | 5.1644   | 1.46177  | -1.82089 | 0.0155513 |
| C3AR1                    | 32.056   | 9.12723  | -1.81235 | 0.0155513 |
| KIAA0226L                | 6.41788  | 1.89241  | -1.76187 | 0.0155513 |
| TSPAN11                  | 22.1212  | 6.53724  | -1.75868 | 0.0155513 |
| SFRP1                    | 1.58589  | 0.472192 | -1.74784 | 0.0351059 |
| SEMA5A                   | 5.26718  | 1.57554  | -1.74119 | 0.0155513 |
| IL7R                     | 10.8159  | 3.26278  | -1.72898 | 0.0155513 |
| CSF2                     | 8.06655  | 25.8906  | 1.6824   | 0.0155513 |
| GALR3                    | 0.488738 | 1.55064  | 1.66573  | 0.0155513 |
| SERPINA1                 | 12.5967  | 4.05062  | -1.63683 | 0.0268614 |

#### Vanillic acid

| Gene                                 | Control Vehicle | VA        | log2_fold_change | q_value    |
|--------------------------------------|-----------------|-----------|------------------|------------|
| EIF1AY                               | 12.2023         | 0.0277272 | -8.78163         | 0.0104271  |
| CCL11                                | 20.913          | 0.203771  | -6.6813          | 0.00330143 |
| MMP12                                | 13.6562         | 0.169591  | -6.33135         | 0.00330143 |
| CXCL10                               | 43.1215         | 0.553861  | -6.28274         | 0.00330143 |
| IDO1                                 | 6.66431         | 0.122341  | -5.76748         | 0.00330143 |
| IL23A                                | 182.688         | 3.8186    | -5.58019         | 0.00330143 |
| MMP7                                 | 2.47688         | 107.857   | 5.44446          | 0.00330143 |
| RP11986E7.7,SERP13, SERPINA4,SERPIN5 | 10.8106         | 405.536   | 5.22931          | 0.00330143 |
| HIF3A                                | 0.514046        | 16.8623   | 5.03576          | 0.00330143 |
| IL6                                  | 6709.62         | 205.125   | -5.03165         | 0.00330143 |

|                            |           |          |          |            |
|----------------------------|-----------|----------|----------|------------|
| LAMA3                      | 0.695779  | 21.194   | 4.92888  | 0.00330143 |
| DKK1                       | 0.913079  | 26.3309  | 4.84988  | 0.00330143 |
| APOD                       | 3.15709   | 80.1754  | 4.66649  | 0.00330143 |
| EREG                       | 58.573    | 2.53097  | -4.53247 | 0.00330143 |
| SLCO2B1                    | 4.068     | 0.180563 | -4.49374 | 0.00330143 |
| PTX3                       | 64.4246   | 1443.97  | 4.48629  | 0.00330143 |
| DCLK1                      | 0.0972317 | 2.08802  | 4.42457  | 0.00330143 |
| LINC00473                  | 12.0236   | 0.64595  | -4.2183  | 0.00330143 |
| CCL8                       | 25.3413   | 1.41583  | -4.16178 | 0.00330143 |
| PRELP                      | 2.75364   | 47.4012  | 4.10551  | 0.00330143 |
| ZBED3                      | 0.244914  | 4.19019  | 4.09667  | 0.00330143 |
| ITGBL1                     | 10.8984   | 183.9    | 4.07674  | 0.00330143 |
| GBP5                       | 6.94778   | 0.423924 | -4.03467 | 0.00330143 |
| SLC38A4                    | 0.231164  | 3.77807  | 4.03066  | 0.00330143 |
| PRODH                      | 0.169971  | 2.54284  | 3.90308  | 0.0124428  |
| THBS1                      | 17.9431   | 259.742  | 3.85558  | 0.00330143 |
| TMEM150C                   | 0.840441  | 11.3287  | 3.75269  | 0.00330143 |
| TJP2                       | 1.30083   | 17.5244  | 3.75186  | 0.00330143 |
| FAM46B                     | 0.114869  | 1.5271   | 3.73274  | 0.00330143 |
| CCL3                       | 8.1225    | 0.623825 | -3.70271 | 0.00330143 |
| ADH1B                      | 0.316882  | 4.08275  | 3.68752  | 0.00330143 |
| IL11                       | 350.332   | 28.4794  | -3.62073 | 0.00330143 |
| CYP4F22                    | 0.174107  | 2.13505  | 3.61622  | 0.00330143 |
| NCAM1                      | 0.0925037 | 1.11978  | 3.59757  | 0.00330143 |
| CTD-2218G20.1              | 0.205667  | 2.37841  | 3.53161  | 0.00592391 |
| TNFSF18                    | 1.79154   | 0.158897 | -3.49504 | 0.00330143 |
| ST6GALNAC5                 | 0.238698  | 2.5881   | 3.43863  | 0.00330143 |
| GPR98,LUCAT1,RP11-213H15.4 | 2.4874    | 0.24385  | -3.35057 | 0.0104271  |
| FGFBP2,PROM1               | 0.431683  | 4.33999  | 3.32965  | 0.00330143 |
| RP11-855A2.5               | 4.77143   | 0.496706 | -3.26396 | 0.0416914  |
| COMP                       | 29.7354   | 272.884  | 3.19803  | 0.00330143 |
| SERPIN3,SERPIN4            | 22.8248   | 2.52288  | -3.17746 | 0.00330143 |
| ADRA2A                     | 1.29417   | 11.654   | 3.17073  | 0.00330143 |

### Psoralidin

| Gene            | Control Vehicle | PS        | log2_fold_change | q_value   |
|-----------------|-----------------|-----------|------------------|-----------|
| TMC5            | 2.63217         | 0.0815934 | -5.01166         | 0.0296    |
| GPR171          | 1.83483         | 0.10289   | -4.15647         | 0.0471184 |
| CCL11           | 21.5156         | 1.50912   | -3.8336          | 0.0296    |
| SLAMF7          | 3.75147         | 0.384534  | -3.28627         | 0.0296    |
| MMP12           | 14.0629         | 1.64358   | -3.09698         | 0.0296    |
| IGFBP3          | 75.9714         | 10.1393   | -2.9055          | 0.0296    |
| C6orf229,FAM65B | 5.54657         | 0.758774  | -2.86985         | 0.0296    |
| CXCL12          | 44.4236         | 7.68137   | -2.53189         | 0.0296    |
| ADAMTS16        | 1.71537         | 0.306635  | -2.48393         | 0.0296    |
| H19             | 0.547717        | 2.84943   | 2.37917          | 0.0471184 |
| SFRP2           | 14.6784         | 2.89915   | -2.33999         | 0.0296    |
| -               | 2.61808         | 0.550791  | -2.24893         | 0.0296    |
| C2CD4A          | 1.46212         | 0.307976  | -2.24717         | 0.0471184 |

|                       |         |          |           |           |
|-----------------------|---------|----------|-----------|-----------|
| COL14A1               | 5.8572  | 1.35211  | -2.115    | 0.0296    |
| COL5A3                | 7.20995 | 1.78696  | -2.01249  | 0.0296    |
| CD248                 | 12.1363 | 3.0379   | -1.99818  | 0.0296    |
| OLFML2B               | 47.6949 | 12.0031  | -1.99043  | 0.0296    |
| CXCL13                | 287.107 | 78.1301  | -1.87764  | 0.0296    |
| GJB2                  | 19.3988 | 5.29622  | -1.87293  | 0.0296    |
| CXCL10                | 44.4021 | 12.2553  | -1.85722  | 0.0296    |
| QPRT,SPN              | 2.50082 | 0.707217 | -1.82218  | 0.0296    |
| PLXDC1                | 9.29195 | 2.85854  | -1.7007   | 0.0296    |
| SERPING1              | 21.0017 | 6.4938   | -1.69337  | 0.0296    |
| SYT7                  | 3.84399 | 1.20596  | -1.67242  | 0.0296    |
| CILP                  | 8.48368 | 2.78906  | -1.60491  | 0.0296    |
| RASD1                 | 8.76984 | 2.92944  | -1.58192  | 0.0296    |
| RPLP0P2               | 12.9542 | 4.35935  | -1.57123  | 0.0471184 |
| MAPK10                | 4.61556 | 1.57044  | -1.55534  | 0.0296    |
| ARHGAP28              | 5.09554 | 1.78527  | -1.51309  | 0.0296    |
| VCAM1                 | 15.6117 | 5.47361  | -1.51206  | 0.0296    |
| S100A4                | 517.472 | 184.818  | -1.48537  | 0.0296    |
| TSPAN11               | 21.8221 | 8.40774  | -1.376    | 0.0296    |
| RP11-82L18.4          | 1.74237 | 0.711546 | -1.29202  | 0.0471184 |
| MMP8                  | 23.8542 | 9.78617  | -1.28543  | 0.0296    |
| CH25H                 | 91.3212 | 39.3359  | -1.2151   | 0.0296    |
| IL7R                  | 10.6755 | 4.62532  | -1.20668  | 0.0471184 |
| MIR23A,MIR24-2,MIR27A | 17.6043 | 7.74944  | -1.18376  | 0.0471184 |
| ITGB8                 | 6.56586 | 3.00451  | -1.12785  | 0.0296    |
| ISLR                  | 62.1145 | 29.6579  | -1.06651  | 0.0296    |
| GAS1                  | 42.5655 | 20.8757  | -1.02786  | 0.0296    |
| SMOC1                 | 238.548 | 119.825  | -0.993346 | 0.0471184 |
| HMOX1                 | 197.539 | 392.255  | 0.989654  | 0.0296    |
| IGFBP5                | 81.4198 | 43.0461  | -0.919498 | 0.0296    |

#### PCA

| Gene         | Control Vehicle | PCA      | log2_fold_change | q_value   |
|--------------|-----------------|----------|------------------|-----------|
| CCL11        | 21.6406         | 0.56146  | -5.26841         | 0.020294  |
| MMP12        | 14.1281         | 0.580278 | -4.60568         | 0.020294  |
| IDO1         | 6.89688         | 0.348589 | -4.30634         | 0.020294  |
| CXCL10       | 44.6263         | 4.00811  | -3.4769          | 0.020294  |
| MIR4477A     | 0.883464        | 8.1207   | 3.20036          | 0.020294  |
| LGI2         | 1.66828         | 0.21936  | -2.92699         | 0.020294  |
| RPLP0P2      | 13.0234         | 2.07816  | -2.64773         | 0.020294  |
| SFRP2        | 14.7299         | 2.44462  | -2.59106         | 0.020294  |
| CXCL12       | 44.6469         | 7.88936  | -2.50058         | 0.020294  |
| PDGFD        | 1.05835         | 0.18828  | -2.49086         | 0.020294  |
| -            | 1.60907         | 0.301419 | -2.41638         | 0.020294  |
| PLXDC1       | 9.3396          | 1.81885  | -2.36034         | 0.020294  |
| SYT7         | 3.864           | 0.815163 | -2.24493         | 0.020294  |
| ADAMTS12     | 2.8952          | 0.615334 | -2.23422         | 0.020294  |
| CD74         | 69.8431         | 15.3655  | -2.18443         | 0.020294  |
| IGFBP3       | 76.3365         | 17.9516  | -2.08826         | 0.020294  |
| -            | 2.63019         | 0.642128 | -2.03423         | 0.0373667 |
| RP11-81H14.2 | 5.93571         | 1.47732  | -2.00644         | 0.0373667 |
| MIR145       | 1.90096         | 0.475952 | -1.99784         | 0.020294  |
| SERPING1     | 21.1015         | 5.49679  | -1.94069         | 0.020294  |
| CH25H        | 91.7586         | 23.9356  | -1.93868         | 0.020294  |

|               |         |         |          |          |
|---------------|---------|---------|----------|----------|
| GJB2          | 19.4963 | 5.16469 | -1.91645 | 0.020294 |
| VCAM1         | 15.6878 | 4.15746 | -1.91586 | 0.020294 |
| COL14A1       | 5.88404 | 1.81486 | -1.69695 | 0.020294 |
| ARHGAP28      | 5.12052 | 1.61141 | -1.66796 | 0.020294 |
| EGR1          | 20.3424 | 63.7766 | 1.64854  | 0.020294 |
| S100A4        | 519.91  | 166.012 | -1.64697 | 0.020294 |
| TMEM158       | 19.1705 | 6.14241 | -1.64201 | 0.020294 |
| LIPG          | 4.26873 | 1.39372 | -1.61486 | 0.020294 |
| TMEM119       | 64.4319 | 21.1053 | -1.61017 | 0.020294 |
| DPP4          | 11.0845 | 3.65438 | -1.60084 | 0.020294 |
| TSPAN11       | 21.9278 | 7.36666 | -1.57368 | 0.020294 |
| CD248         | 12.195  | 4.10483 | -1.57089 | 0.020294 |
| C3AR1         | 31.7871 | 10.8534 | -1.5503  | 0.020294 |
| CXCL13        | 288.38  | 102.208 | -1.49646 | 0.020294 |
| CDCP1         | 4.40174 | 1.58396 | -1.47454 | 0.020294 |
| ADAMTS14      | 3.95449 | 1.44174 | -1.45568 | 0.020294 |
| IL7R          | 10.7273 | 3.93439 | -1.44707 | 0.020294 |
| SEMA5A        | 5.2209  | 1.93812 | -1.42964 | 0.020294 |
| C9orf47,S1PR3 | 16.0296 | 6.10935 | -1.39165 | 0.020294 |
| HAS2          | 13.0453 | 5.02277 | -1.37698 | 0.020294 |
| ITGB8         | 6.59655 | 2.5618  | -1.36455 | 0.020294 |

#### Epimedin C

| Gene                                        | Control Vehicle | Epi C   | log2_fold_change | q_value   |
|---------------------------------------------|-----------------|---------|------------------|-----------|
| H19                                         | 0.537211        | 65.6371 | 6.93288          | 0.0182    |
| MMP7                                        | 2.4939          | 194.161 | 6.2827           | 0.0182    |
| HIF3A                                       | 0.5177          | 22.0082 | 5.40978          | 0.0182    |
| CA9                                         | 2.0508          | 70.6185 | 5.10579          | 0.0383362 |
| RAB11FIP4                                   | 0.159334        | 4.72276 | 4.88951          | 0.0182    |
| SPARCL1                                     | 0.721847        | 17.0604 | 4.56281          | 0.0182    |
| COL2A1                                      | 0.625102        | 14.7129 | 4.55684          | 0.0182    |
| APOD                                        | 3.18023         | 69.3519 | 4.44673          | 0.0182    |
| SLC38A4                                     | 0.232951        | 4.7077  | 4.33692          | 0.0182    |
| RP11986E7.7,SERPINA3,<br>SERPINA4, SERPINA5 | 10.8912         | 195.871 | 4.16867          | 0.0182    |
| APLN                                        | 0.0956189       | 1.48885 | 3.96076          | 0.0182    |
| COMP                                        | 29.9424         | 463.836 | 3.95335          | 0.0182    |
| RSPO2                                       | 0.649701        | 9.99886 | 3.94392          | 0.0182    |
| CAPN6                                       | 0.25947         | 3.93384 | 3.9223           | 0.0182    |
| HSPB7                                       | 0.84741         | 12.8034 | 3.91732          | 0.0182    |
| MATN3                                       | 1.41254         | 20.7226 | 3.87484          | 0.0182    |
| DCLK1                                       | 0.0979673       | 1.39937 | 3.83633          | 0.0182    |
| PRELP                                       | 2.77419         | 34.6352 | 3.6421           | 0.0182    |
| RP11-434D9.1                                | 0.2051          | 2.5318  | 3.62576          | 0.0182    |
| DKK1                                        | 0.91998         | 10.587  | 3.52455          | 0.0490286 |
| -                                           | 0.716545        | 7.77418 | 3.43956          | 0.0304101 |
| ST6GALNAC5                                  | 0.240451        | 2.43521 | 3.34023          | 0.0182    |
| SCRG1                                       | 20.5605         | 207.495 | 3.33513          | 0.0182    |
| CTD-2561J22.2                               | 0.255837        | 2.54356 | 3.31355          | 0.0304101 |
| CLEC18A                                     | 0.249291        | 2.20312 | 3.14365          | 0.0182    |
| ACAN                                        | 10.9287         | 94.5459 | 3.11289          | 0.0182    |
| ZBED3                                       | 0.246552        | 2.06441 | 3.06577          | 0.0182    |
| KIAA1456                                    | 0.835823        | 6.91398 | 3.04825          | 0.0182    |
| ITGA10                                      | 5.30106         | 42.1127 | 2.9899           | 0.0182    |



|               |          |          |          |           |
|---------------|----------|----------|----------|-----------|
| FGFBP2,PROM1  | 0.43552  | 3.40952  | 2.96876  | 0.0182    |
| MMP12         | 13.7658  | 1.82289  | -2.91679 | 0.0383362 |
| GPM6B         | 3.47194  | 25.5839  | 2.88142  | 0.0182    |
| GBP5          | 7.00352  | 0.980563 | -2.8364  | 0.0182    |
| CDH23         | 1.15792  | 0.16522  | -2.80908 | 0.0304101 |
| ADRA2A        | 1.30369  | 9.11261  | 2.80527  | 0.0182    |
| WWP2          | 23.0827  | 143.939  | 2.64058  | 0.0182    |
| S100B         | 0.781904 | 4.80197  | 2.61856  | 0.0304101 |
| GDF5          | 1.70156  | 10.2381  | 2.58902  | 0.0182    |
| MFAP5         | 0.465845 | 2.73492  | 2.55358  | 0.0182    |
| THBS1         | 18.0735  | 104.083  | 2.52579  | 0.0182    |
| LRMP          | 1.25509  | 0.23105  | -2.44151 | 0.0182    |
| CTGF          | 21.7411  | 115.549  | 2.41     | 0.0182    |
| -             | 0.349015 | 1.8206   | 2.38305  | 0.0490286 |
| RP11-284F21.8 | 0.283548 | 1.47866  | 2.38262  | 0.0182    |
| CADPS         | 0.211655 | 1.0837   | 2.35618  | 0.0182    |

**Table S2.** Low-level (specific) process or functions that belong to the high-level category “Connective Tissue Disorder”. **a)** For the VA vs Ctr group, 4 terms including Inflammation of the joint, Rheumatic disease, experimentally induced arthritis, polyarthritis with significant activation z-scores indicate a significant decrease of all these functions. **b)** For the Epi C vs Ctr group abnormality of cartilage tissue, Inflammation of joint, are top results with negative z-scores (predicted decrease, non-significant).

**a.**

| The Filter found 10 Functions for Connective Tissue Disorders |                                             |          |                            |                    |                                           |             |
|---------------------------------------------------------------|---------------------------------------------|----------|----------------------------|--------------------|-------------------------------------------|-------------|
| Categories                                                    | Diseases or Functions Annotation            | p-value  | Predicted Activation State | Activation z-score | Molecules                                 | # Molecules |
| Connective Tissue D...                                        | Inflammation of joint                       | 3.31E-37 | Decreased                  | -2.678             | ↓ABCC1, ↑ABCC2, ↓ABL1, ↑ADA... all 181    | 181         |
| Connective Tissue D...                                        | Rheumatic Disease                           | 4.82E-40 | Decreased                  | -2.501             | ↓ABCC1, ↑ABCC2, ↓ABL1, ↓ACSL5, ...all 216 | 216         |
| Connective Tissue D...                                        | Experimentally-induced arthritis            | 1.19E-13 | Decreased                  | -2.151             | ↑ANXA1, ↑CDH11, ↑CTSS, ↑CXCL13, ...all 36 | 36          |
| Connective Tissue D...                                        | Polyarthritis                               | 5.11E-17 | Decreased                  | -2.133             | ↓ADM, ↑ANXA1, ↓CCL3, ↓CCL5, ...all 43     | 43          |
| Connective Tissue D...                                        | Systemic lupus erythematosus                | 1.72E-13 |                            | -0.614             | ↓ACSL5, ↓ADAMTS6, ↑ANXA1, ↓B... all 61    | 61          |
| Connective Tissue D...                                        | Lupus erythematosus                         | 1.00E-13 |                            | -0.248             | ↓ACSL5, ↓ADAMTS6, ↑ANXA1, ↑B... all 63    | 63          |
| Connective Tissue D...                                        | Non-traumatic arthropathy                   | 1.63E-35 |                            | -0.021             | ↓ABCC1, ↑ABCC2, ↑ADAMTS1, ↑... all 159    | 159         |
| Connective Tissue D...                                        | Rheumatoid arthritis                        | 2.44E-29 |                            | 0.129              | ↑ADAMTS2, ↑ADGRG6, ↓ADM, ↑... all 135     | 135         |
| Connective Tissue D...                                        | Osteoarthritis                              | 3.38E-16 |                            | 0.557              | ↑ADAMTS1, ↑ADAMTS2, ↑ADAMT... all 49      | 49          |
| Connective Tissue D...                                        | Polyarticular juvenile rheumatoid arthritis | 1.76E-13 |                            |                    | ↓ADM, ↓CCL3, ↓CCL5, ↓CD274, ↓C... all 26  | 26          |

**b.**

| The Filter found 19 Functions for Connective Tissue Disorders |                                       |          |                            |                    |                                              |             |
|---------------------------------------------------------------|---------------------------------------|----------|----------------------------|--------------------|----------------------------------------------|-------------|
| Categories                                                    | Diseases or Functions Annotation      | p-value  | Predicted Activation State | Activation z-score | Molecules                                    | # Molecules |
| Connective Tissue Disorders,Organis...                        | Abnormality of cartilage tissue       | 2.50E-08 |                            | -1.915             | ↑ACAN, ↑ADRA2A, ↑ASPN, ↑BGN, ↑CC... all 18   | 18          |
| Connective Tissue Disorders,Inflam...                         | Inflammation of joint                 | 3.69E-21 |                            | -1.773             | ↑ACAN, ↑ADAMTS1, ↑ADGRG6, ↑ADRA... all 78    | 78          |
| Connective Tissue Disorders,Organis...                        | Non-traumatic arthropathy             | 1.73E-21 |                            | -1.446             | ↑ACAN, ↑ADAMTS1, ↑ADGRG6, ↑ADRA... all 71    | 71          |
| Connective Tissue Disorders,Inflam...                         | Rheumatic Disease                     | 1.28E-22 |                            | -1.134             | ↑ACAN, ↓ACSL5, ↑ADAMTS1, ↑ADGRG6, ...all 92  | 92          |
| Connective Tissue Disorders,Heredit...                        | Hereditary connective tissue disorder | 7.02E-07 |                            | -1.054             | ↑ACAN, ↑ADGRG6, ↑ASPN, ↑BGN, ↑CC... all 33   | 33          |
| Connective Tissue Disorders,Develop...                        | Dysplasia of skeleton                 | 7.97E-10 |                            | -1.000             | ↑ACAN, ↑ADRA2A, ↑BGN, ↑CCN2, ↑CO... all 21   | 21          |
| Connective Tissue Disorders,Inflam...                         | Polyarthritis                         | 2.02E-06 |                            | -0.577             | ↓CCL20, ↓CD74, ↑COL2A1, ↓CSF3, ↑GA... all 15 | 15          |
| Connective Tissue Disorders,Immun...                          | Rheumatoid arthritis                  | 1.76E-16 |                            |                    | ↑ACAN, ↑ADGRG6, ↑ADRA2A, ↓AQP9, ↑... all 58  | 58          |
| Connective Tissue Disorders,Inflam...                         | Osteoarthritis                        | 4.63E-11 |                            |                    | ↑ACAN, ↑ADAMTS1, ↑ADRA2A, ↑ASPN; ... all 24  | 24          |
| Connective Tissue Disorders,Develop...                        | Familial skeletal dysplasia           | 7.78E-09 |                            |                    | ↑ACAN, ↑BGN, ↑CCN2, ↑COL11A1, ↑CO... all 19  | 19          |
| Connective Tissue Disorders,Develop...                        | Chondrodysplasia                      | 3.37E-08 |                            |                    | ↑ACAN, ↑BGN, ↑CCN2, ↑COL11A1, ↑CO... all 11  | 11          |

MEK/MA  
P;PI3K  
Inhibitors

**Table S3.** The results of the Upstream Regulator Analysis filtered for compounds and drugs and sorted according to their predicted activity and the number of targets. For the VA vs Ctr treatment group, several anti-inflammatory or immunosuppressive chemicals, e.g. dexamethasone or glucocorticoid, were found to be on top of this list. Also, different small molecule compounds, known to interfere with the activity of MEK/MAP or PI3 kinases were also found to be high in that list of putative Upstream Regulators.

| Upstream Regulator                | Expr Log Ratio | Molecule Ty...          | Predicted Ac... | Activation z... | p-value of o... | Target ...           | Mechanistic... |
|-----------------------------------|----------------|-------------------------|-----------------|-----------------|-----------------|----------------------|----------------|
| dexamethasone                     |                | chemical drug           | Activated       | 8.402           | 1.33E-85        | ↓ABCC1, P...all 298  | 573 (22)       |
| U0126                             |                | chemical - kinase in... | Activated       | 3.282           | 1.47E-42        | ↓ACKR3, ↓...all 106  | 297 (13)       |
| PD98059                           |                | chemical - kinase in... | Activated       | 2.421           | 9.49E-39        | ↑ABCC2, P...all 106  | 378 (14)       |
| LY294002                          |                | chemical - kinase in... | Activated       | 2.354           | 3.67E-34        | ↓ABCC1, ↓...all 96   | 388 (12)       |
| SB203580                          |                | chemical - kinase in... | Activated       | 3.312           | 1.66E-34        | ↑ANXA1, ↓...all 90   | 425 (15)       |
| filgrastim                        |                | biologic drug           | Activated       | 3.869           | 2.69E-23        | ↑ALDH6A1, ↓...all 73 |                |
| cyclosporin A                     |                | biologic drug           | Activated       | 2.733           | 1.44E-16        | ↑ABCC2, ↓...all 63   | 393 (18)       |
| fluticasone propionate            |                | chemical drug           | Activated       | 4.613           | 2.53E-40        | ↑ABLIM3, ↓...all 62  | 454 (18)       |
| genistein                         |                | chemical drug           | Activated       | 2.486           | 8.19E-15        | ↓ADM, ↓A...all 56    | 364 (15)       |
| diethylstilbestrol                |                | chemical drug           | Activated       | 2.089           | 6.08E-16        | ↓AQP9, ↑B...all 50   | 481 (21)       |
| glucocorticoid                    |                | chemical drug           | Activated       | 3.721           | 4.69E-16        | ↑ANXA1, ↓...all 49   | 313 (14)       |
| epigallocatechin-gallate          |                | chemical drug           | Activated       | 2.940           | 7.68E-15        | ↓CCL2, ↓C...all 41   | 314 (16)       |
| 15-deoxy-delta-12,14 -PG 2        |                | chemical - endogen...   | Activated       | 2.166           | 1.69E-14        | ↓BIRC3, ↓...all 36   | 292 (15)       |
| simvastatin                       |                | chemical drug           | Activated       | 2.109           | 1.07E-11        | ↑ADAMTS1, ...all 35  | 344 (15)       |
| methotrexate                      |                | chemical drug           | Activated       | 2.772           | 1.72E-09        | ↓CCL11, ↓...all 34   | 377 (17)       |
| prednisolone                      |                | chemical drug           | Activated       | 3.044           | 4.46E-10        | ↓BAG1, ↓B...all 34   | 419 (19)       |
| bexarotene                        |                | chemical drug           | Activated       | 2.753           | 2.59E-10        | ↓AKR1C3, ↑...all 31  | 487 (22)       |
| caffeic acid phenethyl ester      |                | chemical drug           | Activated       | 2.652           | 3.26E-15        | ↓ABL1, ↑B...all 28   | 280 (12)       |
| hydrocortisone                    |                | chemical - endogen...   | Activated       | 3.050           | 3.32E-10        | ↓ADM, ↓C...all 26    | 463 (21)       |
| Sb202190                          |                | chemical - kinase in... | Activated       | 2.657           | 7.96E-10        | ↓CCL2, ↓C...all 24   | 364 (15)       |
| GW3965                            |                | chemical reagent        | Activated       | 2.006           | 3.16E-08        | ↑ADRA2A, P...all 21  | 445 (24)       |
| Bay 11-7082                       |                | chemical - kinase in... | Activated       | 3.522           | 4.82E-12        | ↓BCL2A1, ↓...all 20  | 257 (11)       |
| aspirin                           |                | chemical drug           | Activated       | 2.296           | 4.03E-08        | ↓CCL2, ↓C...all 19   | 302 (16)       |
| Sn50 peptide                      |                | chemical toxicant       | Activated       | 2.542           | 9.63E-11        | ↓BCL2A1, ↓...all 18  | 409 (15)       |
| glutamine                         |                | chemical - endogen...   | Activated       | 2.079           | 1.08E-06        | ↓ATF4, ↓A...all 17   | 341 (19)       |
| figulimod                         |                | chemical drug           | Activated       | 2.605           | 2.60E-07        | ↓BDNF, ↓C...all 16   | 321 (17)       |
| Go 6976                           |                | chemical - kinase in... | Activated       | 2.552           | 9.00E-09        | ↓ABCA7, ↓...all 16   | 279 (14)       |
| carbon monoxide                   |                | chemical - endogen...   | Activated       | 2.188           | 3.34E-08        | ↓ATF4, ↓B...all 15   | 339 (15)       |
| BAPTA-AM                          |                | chemical reagent        | Activated       | 2.189           | 1.21E-09        | ↓ATF3, ↓B...all 15   | 360 (20)       |
| diphenyleiodonium                 |                | chemical reagent        | Activated       | 2.064           | 1.07E-06        | ↓CCL2, ↓C...all 13   | 337 (17)       |
| etanercept                        |                | biologic drug           | Activated       | 3.420           | 1.66E-09        | ↓CCL2, ↓C...all 12   | 375 (15)       |
| apigenin                          |                | chemical - endogen...   | Activated       | 2.964           | 1.40E-04        | ↓CCL2, ↓C...all 12   | 290 (19)       |
| 2,4,5,2',4',5'-hexachlorobiphenyl |                | chemical toxicant       | Activated       | 2.309           | 3.06E-03        | ↑AGPAT4, P...all 12  |                |
| phenylbutazone                    |                | chemical drug           | Activated       | 2.229           | 8.11E-06        | ↑ABCC2, ↑...all 12   | 241 (7)        |
| infliximab                        |                | biologic drug           | Activated       | 2.137           | 1.12E-04        | ↓CXCL1, ↓...all 11   | 405 (19)       |
| resolvin D1                       |                | chemical - endogen...   | Activated       | 2.043           | 1.06E-07        | ↓CCL2, ↓C...all 11   | 362 (15)       |
| PS-1145                           |                | chemical - kinase in... | Activated       | 2.262           | 5.08E-11        | ↓CCL2, ↓C...all 11   | 296 (16)       |
| sorafenib                         |                | chemical dru...         | Activated       | 2.720           | 2.81E-07        | ↓ATF5, ↓C...all 11   | 415 (23)       |

**Table S4.** The results of the Upstream Regulator Analysis filtered for compounds and drugs and sorted according to their predicted activity and the number of targets. For the Epi C vs Ctr treatment group, several anti-inflammatory or immunosuppressive chemicals, e.g. dexamethasone or glucocorticoid, were found to be on top of this list. All z scores are above 2 which showed they are significantly activated.

| Upstream Regula...             | Expr Log Ratio | Molecule Type             | Predicted Activati... | Activation z-score | Flags | p-value of overlap | Target molec...           | Mechanistic Net... |
|--------------------------------|----------------|---------------------------|-----------------------|--------------------|-------|--------------------|---------------------------|--------------------|
| dexamethasone                  |                | chemical drug             | Activated             | 5.030              |       | 9.16E-37           | ↑ACTG2, ↑ADA...all 117    | 198 (21)           |
| beta-estradiol                 |                | chemical - endogenous ... | Activated             | 2.144              |       | 2.48E-13           | ↑ADAMTSL, ↑LA...all 75    | 187 (20)           |
| dihydrotestosterone            |                | chemical - endogenous ... | Activated             | 2.274              | bias  | 1.52E-15           | ↑ADAMTSL, ↑A...all 40     | 214 (24)           |
| filgrastim                     |                | biologic drug             | Activated             | 2.990              |       | 6.56E-07           | ↓CD74, ↑CST3, ↓...all 23  |                    |
| cyclosporin A                  |                | biologic drug             | Activated             | 2.925              |       | 3.19E-06           | ↓AKR1B1, ↑APOD...all 22   | 139 (20)           |
| diethylstilbestrol             |                | chemical drug             | Activated             | 2.302              |       | 2.30E-06           | ↑AQP9, ↑CCNA2, ...all 18  | 109 (7)            |
| metribolone                    |                | chemical reagent          | Activated             | 2.221              | bias  | 1.07E-04           | ↑ADAMTSL, ↑A...all 15     | 223 (23)           |
| bexarotene                     |                | chemical drug             | Activated             | 2.699              |       | 2.52E-06           | ↑AKR1C1/AKR1C2...all 14   | 85 (13)            |
| deferoxamine                   |                | chemical drug             | Activated             | 2.280              | bias  | 7.72E-05           | ↑ADGRG1, ↑CA9;...all 12   | 114 (15)           |
| cyclic AMP                     |                | chemical - endogenous ... | Activated             | 2.113              | bias  | 3.12E-03           | ↑ADRA2A, ↓CCL2, ...all 11 | 168 (21)           |
| RS020                          |                | chemical reagent          | Activated             | 2.588              | bias  | 5.19E-07           | ↑CCN2, ↑DKK1, ↑...all 10  | 102 (14)           |
| allopurinol                    |                | chemical drug             | Activated             | 2.530              | bias  | 9.21E-07           | ↑ADAMTSL, ↑C...all 10     | 134 (16)           |
| quercetin                      |                | chemical drug             | Activated             | 2.138              |       | 3.91E-04           | ↓CCL2, ↓CXCL10;...all 9   | 123 (19)           |
| 17-alpha-ethinylestradiol      |                | chemical drug             | Activated             | 2.157              |       | 8.17E-04           | ↑AQP9, ↑CD74, ↑...all 9   | 183 (19)           |
| methapyrilene                  |                | chemical drug             | Activated             | 2.236              |       | 1.67E-03           | ↑CBS/CBSL, ↑CST3;...all 8 |                    |
| GnRH-A                         |                | chemical reagent          | Activated             | 2.425              |       | 9.62E-04           | ↓FST, ↑GADD45B;...all 6   | 134 (12)           |
| corticosterone                 |                | chemical - endogenous ... | Activated             | 2.200              |       | 1.25E-02           | ↑CCN2, ↑DDIT4, ↑...all 6  |                    |
| phenylbutazone                 |                | chemical drug             | Activated             | 2.433              | bias  | 3.61E-04           | ↑ADAMTSL, ↑LA...all 6     |                    |
| 2-bromoethylamine              |                | chemical reagent          | Activated             | 2.425              | bias  | 1.17E-04           | ↑ADAMTSL, ↑LA...all 6     |                    |
| gentamicin C                   |                | chemical drug             | Activated             | 2.449              | bias  | 5.13E-04           | ↑ADAMTSL, ↑LA...all 6     |                    |
| fenamic acid                   |                | chemical reagent          | Activated             | 2.425              | bias  | 7.68E-04           | ↑ADAMTSL, ↑LA...all 6     |                    |
| triamterene                    |                | chemical drug             | Activated             | 2.433              | bias  | 6.05E-04           | ↑ADAMTSL, ↑LA...all 6     |                    |
| vancomycin                     |                | biologic drug             | Activated             | 2.401              | bias  | 2.55E-03           | ↑ADAMTSL, ↑LA...all 6     |                    |
| hexachlorobenzene              |                | chemical toxicant         | Activated             | 2.236              | bias  | 2.03E-03           | ↑LAMC2, ↑MYC, ↑...all 5   | 77 (6)             |
| lomustine                      |                | chemical drug             | Activated             | 2.236              | bias  | 3.38E-03           | ↑LAMC2, ↑MYC, ↑...all 5   |                    |
| phenacetin                     |                | chemical drug             | Activated             | 2.236              | bias  | 5.01E-04           | ↑LAMC2, ↑MYC, ↑...all 5   |                    |
| eicosapentenoic acid           |                | chemical drug             | Activated             | 2.235              |       | 1.53E-02           | ↓CCL2, ↓MMP9, ↓...all 5   |                    |
| etanercept                     |                | biologic drug             | Activated             | 2.236              | bias  | 9.79E-05           | ↓CCL2, ↓CCL20, ↓...all 5  | 129 (16)           |
| ethionine                      |                | chemical toxicant         | Activated             | 2.000              | bias  | 3.24E-03           | ↑LAMC2, ↑MYC, ↑...all 4   |                    |
| 2,4,5,2',4',5'-hexachlorobi... |                | chemical toxicant         | Activated             | 2.000              |       | 9.90E-02           | ↑AOX1, ↑EBF1, ↑...all 4   |                    |
